# Supplementary material for: Synthesis of a ternary Bi2O3/CQDs/rGO photocatalyst to active peroxymonosulfate for the removal of tetracycline hydrochloride
Source: Royal Society of Chemistry journal article supplement (doi:10.1039/d2cp04434j), 2022-01-01
Supplement: d2cp04434j1.pdf [file d2cp04434j1.pdf]

# Supporting Information

## Synthesis of a ternary Bi<sub>2</sub>O<sub>3</sub>/CQDs/rGO photocatalyst to active peroxymonosulfate for removal of tetracycline hydrochloride

Mingyang Long,<sup>a</sup> Di Li,<sup>\*a</sup> Hongmiao Li,<sup>a</sup> Li Wang,<sup>b</sup> Qianqian Zhao,<sup>a</sup> Qi Wen<sup>a</sup> and Fang Song<sup>c</sup>

<sup>a</sup> School of Chemistry and Chemical Engineering, Xi'an University of Architecture and Technology, Xi'an, 710055, China

<sup>b</sup> School of Environmental and Municipal Engineering, Xi'an University of Architecture and Technology, Xi'an, 710055, China

<sup>c</sup> Instrument Analysis Center, Xi'an University of Architecture and Technology, Xi'an, 710055, China

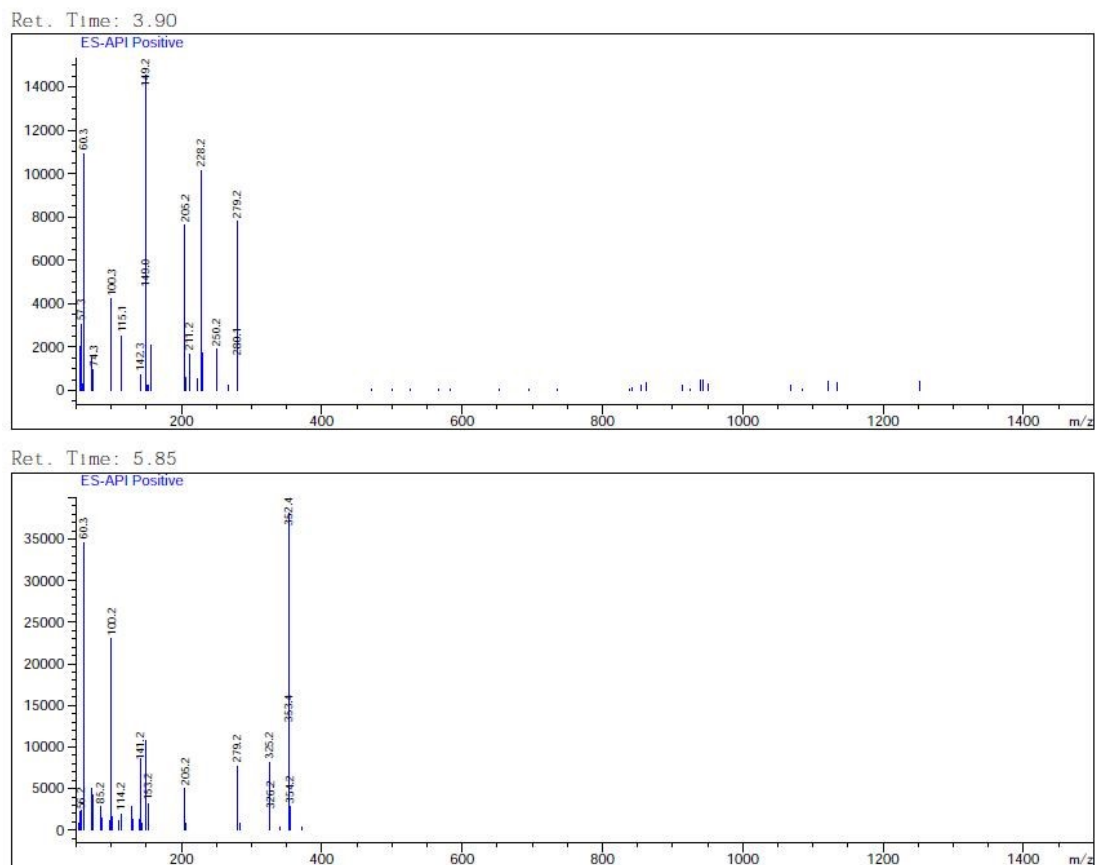

**Fig. 1** UPLC–MS results of tetracycline hydrochlorid degradation products [BO/CQDs/rGO-10: 0.5 g L<sup>-1</sup>; PMS: 0.3 mmol; tetracycline hydrochlorid: 40 mg L<sup>-1</sup>].
